# Supplementary material for: SENEBLOC, a long non-coding RNA suppresses senescence via p53-dependent and independent mechanisms
Source: PubMed Central journal article supplement — Nucleic Acids Res. 2020 Feb 7;48(6):3089–102. doi: 10.1093/nar/gkaa063 (PMC7102969; doi:10.1093/nar/gkaa063), 2020-02-07
Supplement: gkaa063_supplemental_file.pdf [file gkaa063_supplemental_file.pdf]

# SUPPLEMENTARY MATERIALS

Figure S1

A

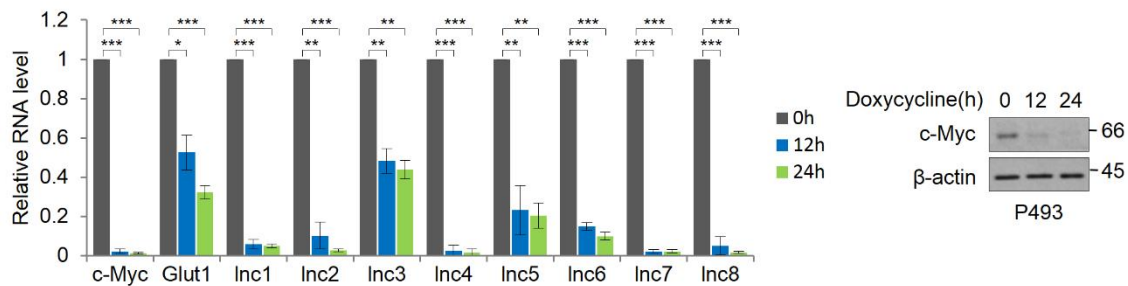

B

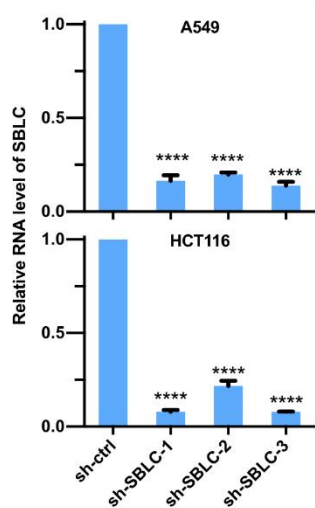

C

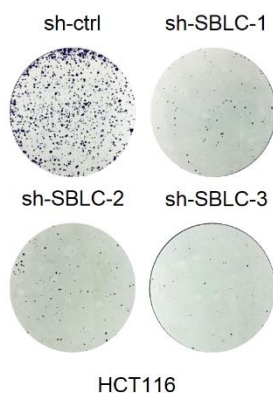

D

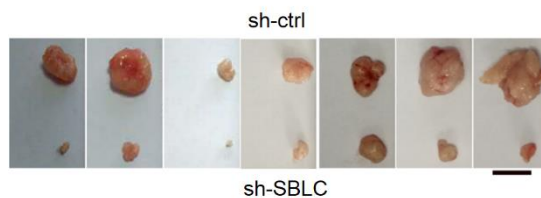

E

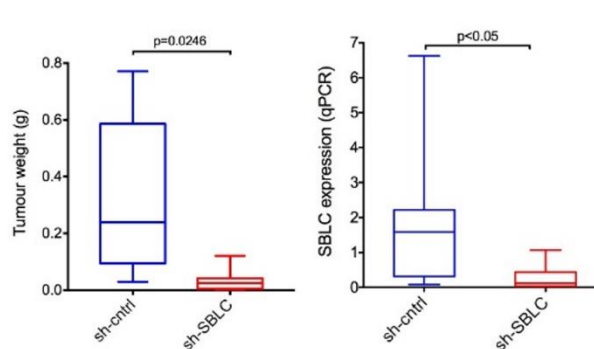

F

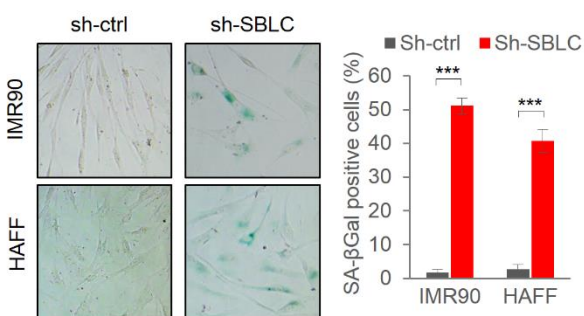

G

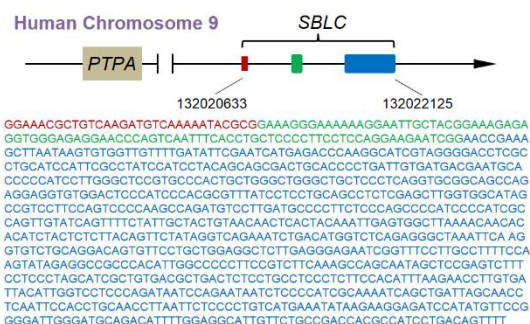

H

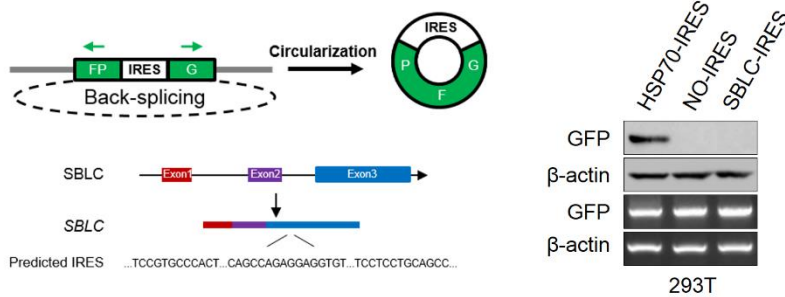

## **Fig. S1**

**(A) lncRNA validation.** qPCR profiling of lncRNAs 1-8 after induced expression of c-Myc in P493 cells using a doxycycline-driven Tet-Off system. c-Myc mRNA (left) and protein (right) were included as controls.  $\beta$ -actin was used throughout as a blotting control. \*  $p < 0.05$ , \*\*  $P < 0.01$ , \*\*\*  $P < 0.001$ , \*\*\*\*  $P < 0.0001$ , Students t-test. Mean  $\pm$  SEM;  $n=3$ .

**(B) shRNA efficiency.** qPCR analysis of SBLC levels in either A549 or HCT116 cells following transduction of three independent shRNAs (sh-SBLC-1, -2, -3) against SBLC compared to an shRNA control (sh-ctrl). \*\*\*\*  $p < 0.0001$  by one-way ANOVA, values are mean  $\pm$  SEM;  $n = 3$ .

**(C-E) Inhibition of SBLC suppresses tumor growth *in vitro* and *in vivo*.** (C) Clonogenic assay following in HCT116 cells following transduction of three independent shRNAs (sh-SBLC-1, -2, -3) against SBLC compared to an shRNA control (sh-ctrl). The results are representative of three experiments. (D) Growth comparison of xenografted HCT116 tumors transduced with either sh-Ctrl or sh-SBLC#3 and injected subcutaneously into the contralateral flanks of nude mice after 3 w. Box and Whisker plot comparing weights of excised tumors.  $n = 7$  tumors/group; statistics, 2 way ANOVA. (E) Relative levels of SBLC expression measured by qPCR in tumors from part D.

**(F) SBLC inhibits senescence induction in non-transformed cells.** Photomicrographs of SA  $\beta$ -galactosidase staining in IMR90 or HAFF cells 48 h after shRNA transduction with either control or SBLC-targeting shRNA#3 (left). Quantitation showing significantly increased SA  $\beta$ -galactosidase staining in sh-SBLC#3 treated cells (right). \*\*\*  $p < 0.001$  by Students t-test, mean  $\pm$  SEM;  $n = 3$ .

**(G) Schematic illustration of the intron-exon structure of *SENEBLOC* on chromosome 9.** Nucleotide sequences corresponding to the three exons are color highlighted.

**(H) SBLC IRES does not support translation.** Schematic illustrating the GFP-IRES translation reporter system (top) and the location of the predicted IRES in SBLC (bottom). GFP present in reverse order is bifurcated by insertion of an IRES-containing sequence. Backsplicing to produce a circular RNA reconstitutes the GFP sequence and allows measurement of IRES-mediated translation. Western blot analysis of transfected 293T cells (right) shows only the positive control HSP70-IRES resulted in GFP expression while no translation was recorded with the SBLC-IRES or the no IRES control. Semi-quantitative RT-PCR of GFP or  $\beta$ -actin from total RNA was used as controls. Data are representative of three independent experiments.

Figure S2

A

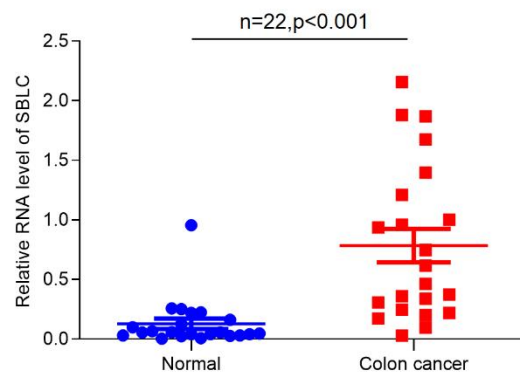

B

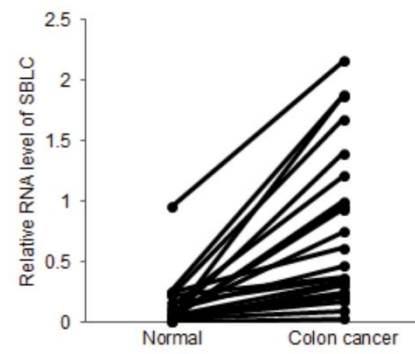

C

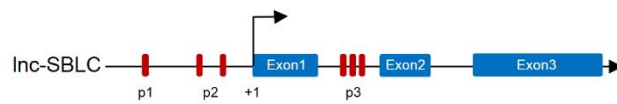

| c-Myc binding sites | Position      | sequence    |
|---------------------|---------------|-------------|
| P1                  | -5574 ~ -5564 | TGCCACGTGGA |
| P2-1                | -4650 ~ -4640 | CAGCACCTGGC |
| P2-2                | -4202 ~ -4192 | AGGCCCGTGGT |
| P3-1                | 253 ~ 263     | AGACACGTGTC |
| P3-2                | 292 ~ 302     | GACCATGTGCG |
| P3-3                | 363 ~ 373     | GTCCCGTGGC  |

**Fig. S2**

**Analysis of SBLC expression in colon cancer tissues.** (A) The relative expression of SBLC RNA was determined using qPCR analysis in 22 paired samples of colorectal cancer versus normal adjacent tissues. (B) Pairwise comparisons of SBLC expression in normal versus tumor samples from (A).

(C) **c-Myc binding sites in SBLC.** Schematic showing the location of six predicted c-Myc binding sequences in *SBLC* (red; top) with accompanying sequence and location with respect to the transcriptional start site (bottom).

Figure S3

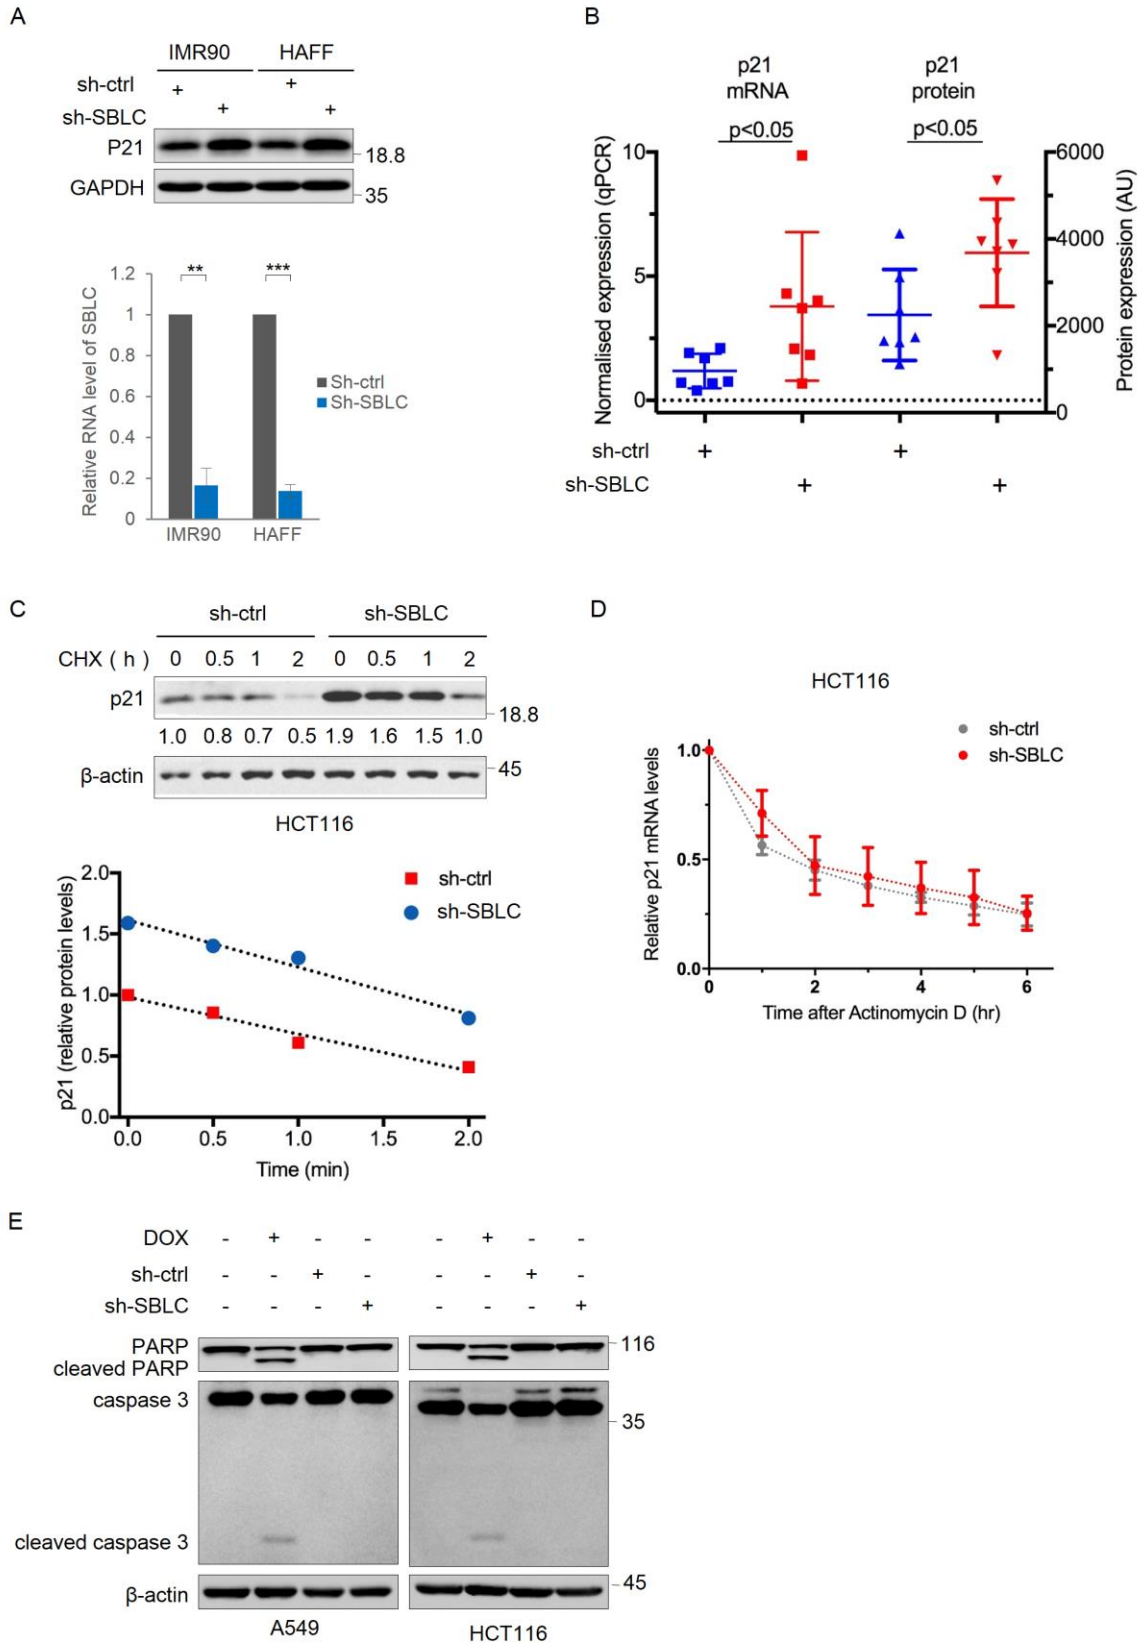

### **Fig. S3**

**(A) p21 is induced in non-transformed cells after SBLC knockdown.** IMR90 and HAFF cells were transduced with sh-Ctrl or sh-SBLC#3 and the levels of p21 along with GAPDH measured using Western blot (top). Depletion of SBLC levels was confirmed by qPCR (bottom). \*\* P < 0.01, \*\*\* P < 0.001, values are mean  $\pm$  SEM; n = 3. Results are representative of 3 experiments.

**(B) Measurement of p21 in HCT116 sh-control versus sh-SBLC#3 tumors.** The levels of p21 mRNA and protein from the experiment shown in Fig. S1D were determined by qPCR and Western blotting, respectively.

**(C) SBLC influences p21 protein levels but not stability.** HCT116 cells transduced with sh-ctrl or sh-SBLC#3 were treated with 50 $\mu$ M cycloheximide (CHX) with cell lysates subjected to Western blot against p21 or  $\beta$ -actin (top). Comparative rates of p21 degradation in sh-ctrl or sh-SBLC#3 transduced cells are similar as determined by densitometric analysis (bottom). Data are representative of 3 experiments.

**(D) SBLC does not influence p21 mRNA transcript stability.** HCT116 cells transduced with sh-ctrl or sh-SBLC#3 were treated with actinomycin D (1mg/mL) for the indicated times and p21 mRNA levels determined by qPCR. Values are means  $\pm$  SEMs; n = 3.

**(E) SBLC depletion does not induce apoptosis.** Western blotting analysis of PARP and caspase 3 in A549 or HCT116 cells comparing nil addition versus pre-treatment with sh-ctrl or sh-SBLC#3 shRNAs. Doxorubicin (DOX; 1  $\mu$ g/mL for 24 h) was included as an apoptotic stimulus while  $\beta$ -actin served as a loading control. The results are representative of three experiments.

Figure S4

A

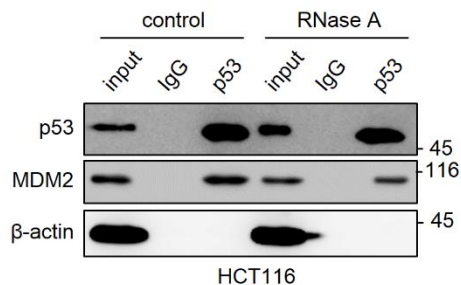

B

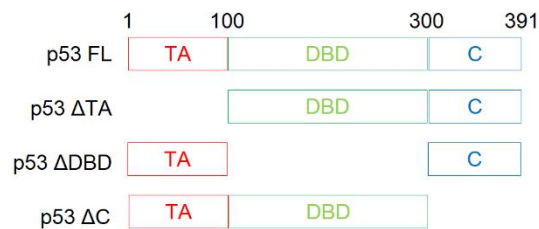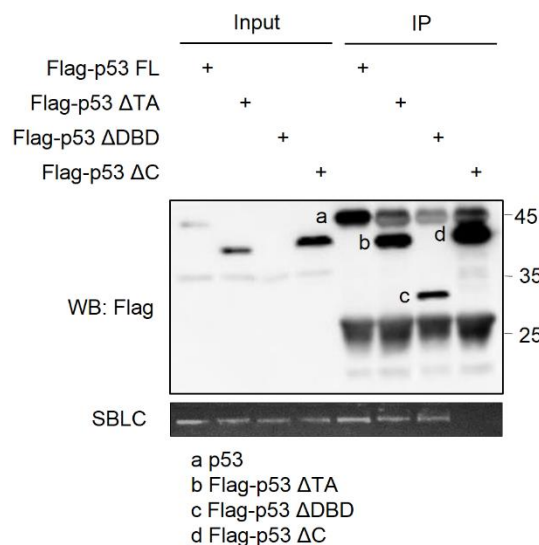

D

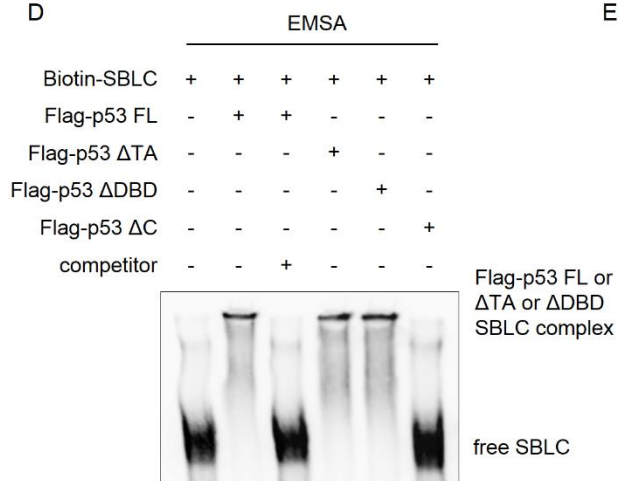

C

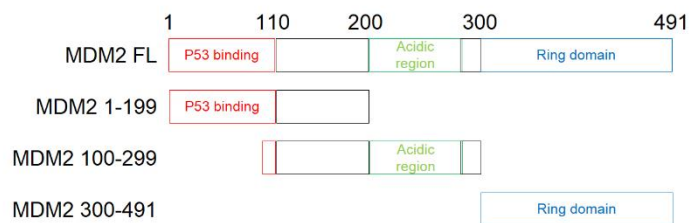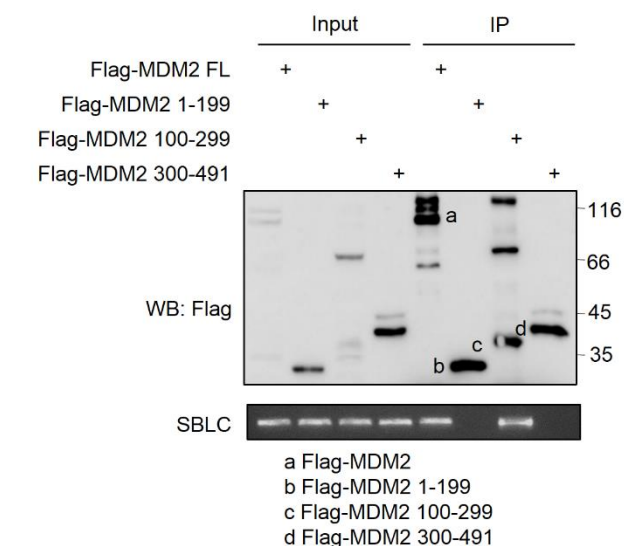

E

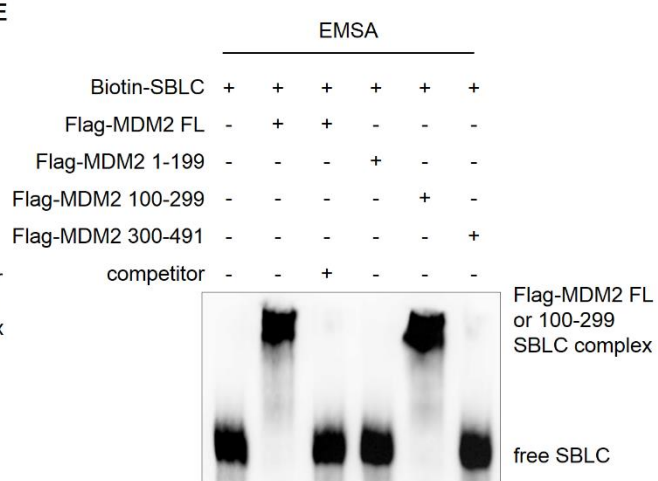



## **Figure S4**

**(A) RNase treatment disrupts the interaction between p53 and MDM2.** Cell lysates from HCT116 cells were untreated or treated with RNase A before performing immunoprecipitations against p53 or a control. The relative amounts of p53 and co-precipitated MDM2 were assessed by Western blot.  $\beta$ -actin was included as a control.

**(B) SBLC interacts with the C-terminal domain of p53.** Schematic showing the domain organization of the p53 protein along with corresponding Flag-tagged expression constructs used for mapping experiments (top). Individual expression constructs were used to transfect HCT116 cells before cell lysis and RNA immunoprecipitation assay. Equal proportions of input and IP samples were subjected to Western blotting with anti-Flag antibodies (top) and semi-quantitative PCR to detect SBLC (bottom). Key (a-d) show recombinant protein bands, other bands are non-specific. Results are representative of 3 experiments.

**(C) SBLC interacts with the central acidic domain of MDM2.** Schematic showing the domain organization of the MDM2 protein along with corresponding Flag-tagged expression constructs used for mapping experiments (top). The experiment from (A) was repeated with individual MDM2 expression constructs. Results are representative of 3 experiments.

**(D-E) Gel shift assays confirm that SBLC interacts with the C-terminal domain of p53 and the central acidic domain of MDM2.** EMSAs were conducted between SBLC and purified FL Flag-p53 or the p53-domain constructs ( $\Delta$ TA,  $\Delta$ DBD,  $\Delta$ C) (**D**) or between SBLC and FL Flag-MDM2 or the MDM2 domain constructs (1-199, 100-299, 300-491) (**E**).

Figure S5

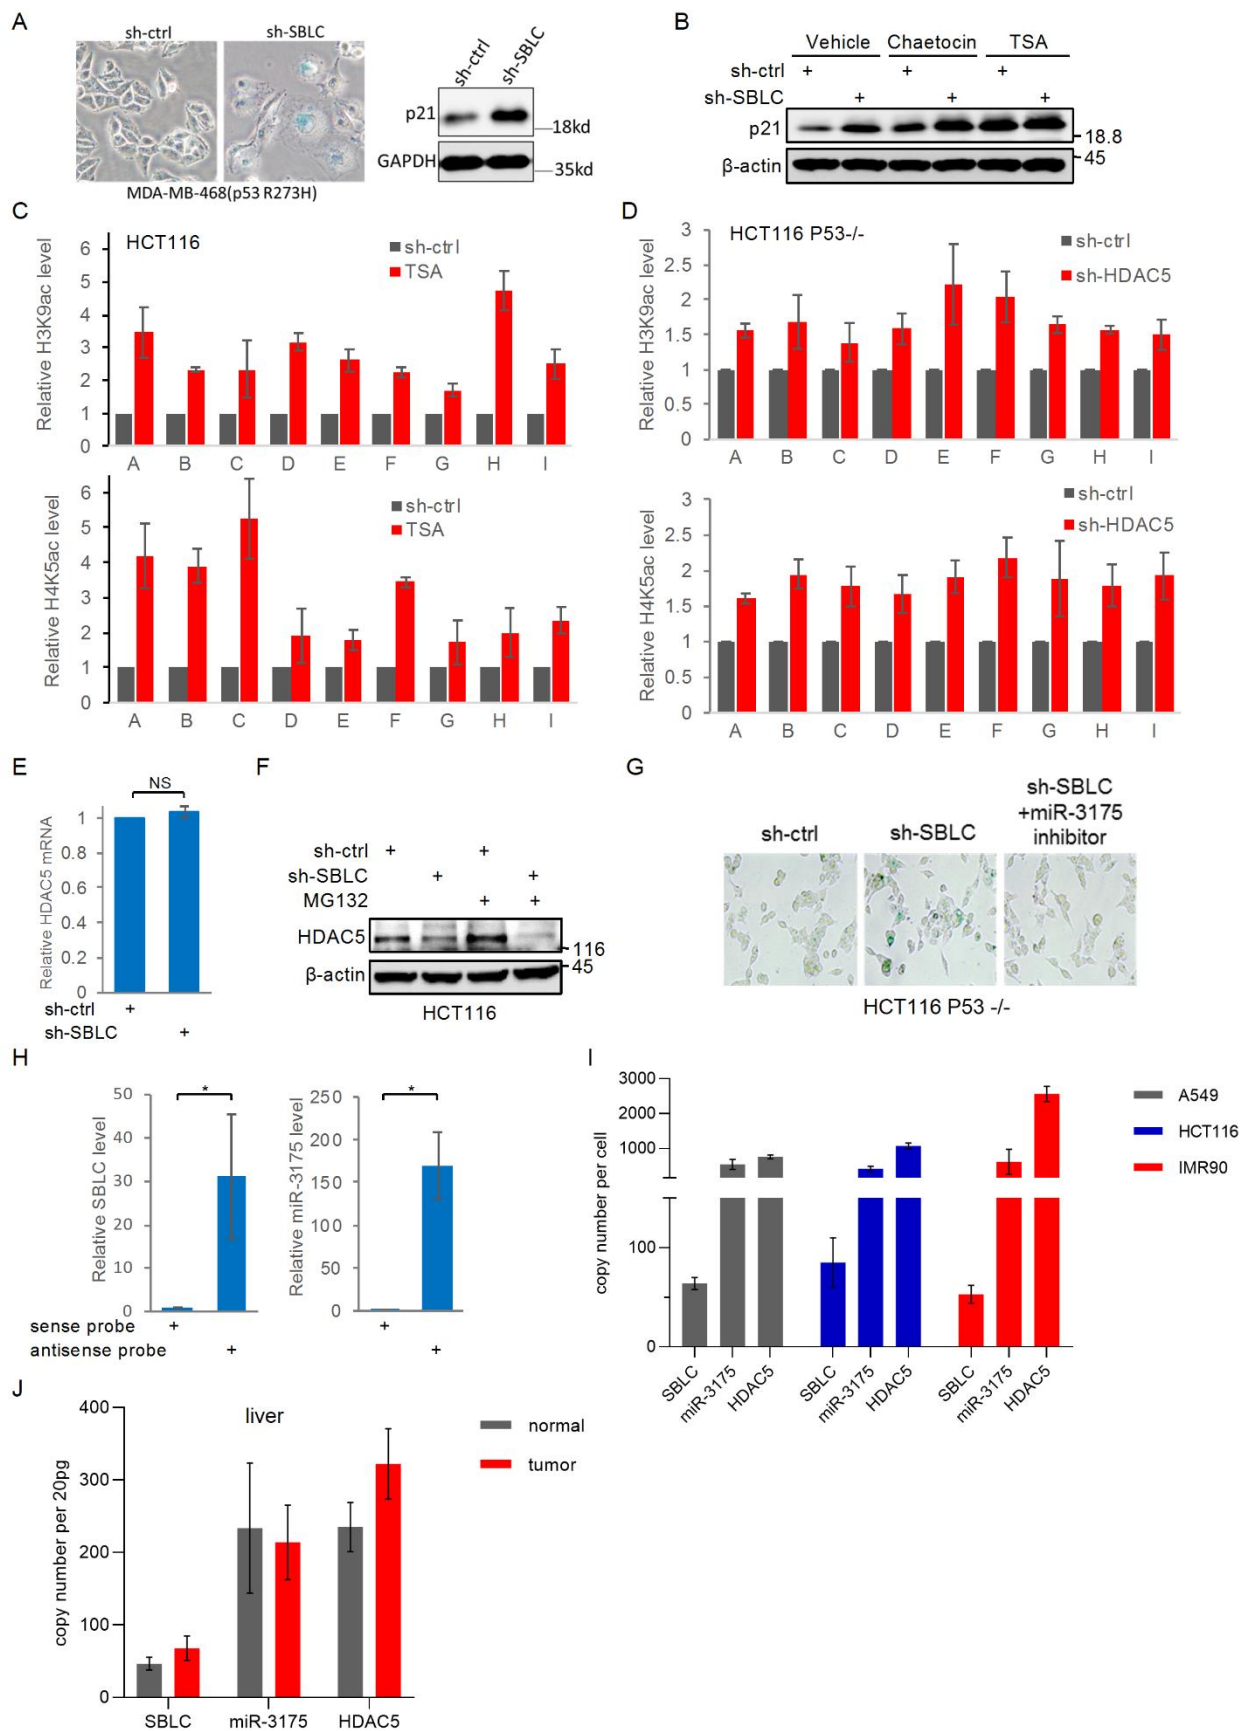

## **Figure S5**

**(A) SBLC inhibits senescence induction in p53 mutant cells.** Photomicrographs of SA  $\beta$ -galactosidase staining in MDA-MB-468 cells 48 h after shRNA transduction with either control or SBLC-targeting shRNA#3 (left). p21 protein levels were measured by Western blotting. GAPDH was included as a loading control. Representative of 3 experiments.

**(B) Effect of methyltransferases and histone deacetylase inhibitors in combination with SBLC knockdown on p21 expression.** Control or sh-SBLC transduced HCT116 cells (p53<sup>-/-</sup>) were pre-treated for 24h with 0.5  $\mu$ M Chaetocin or 1  $\mu$ M Trichostatin A (TSA) and p21 protein levels measured by Western blotting.  $\beta$ -actin was included throughout as a loading control. Representative of 3 experiments.

**(C) Chromatin repression at the p21 promoter is reversed with HDACi treatment.** HCT116 were treated with 1  $\mu$ M TSA for 24 hr before conducting ChIP assays using anti-H3K9ac or H4K5ac antibodies along with normal rabbit IgG as per Fig. 5B. **(D)** The experiment in (B) was repeated in HCT116 p53<sup>-/-</sup> cells after shRNA against HDAC5.

**(E) qPCR analysis of HDAC5 mRNA in HCT116 cells after sh-SBLC.** NS, not significant, Student's t-test. Mean  $\pm$  SEM; n=3.

**(F)** HCT116 cells transduced with either sh-ctrl or sh-SBLC#3 were treated with vehicle or 20 $\mu$ M MG132 for 4h before Western blotting against HDAC5.  $\beta$ -actin was included throughout as a loading control. Representative of 3 experiments.

**(G) Inhibition of miR-3175 antagonises senescence induction caused by SBLC depletion.** HCT116 p53<sup>-/-</sup> cells were treatment with sh-SBLC#3 alone and in combination with transfection of miR-3175 inhibitors before conducting by SA- $\beta$ -galactosidase staining.

**(H)** RNA pulldown assays using biotin-labeled sense or antisense SBLC DNA probes conducted with HCT116 cells before analysis by qPCR (right). Mean  $\pm$  SEM, n=3, \* P <0.05 Student's t-test.

**(I, J)** Absolute expression levels of SBLC, miR-3175 and HDAC5 mRNA determined from A549, HCT116 and IMR90 cell lines **(I)** and paired normal and cancer liver tissues **(J)** determined using a standard curve-based qPCR method. Mean  $\pm$  SEM, n=3.

Figure S6

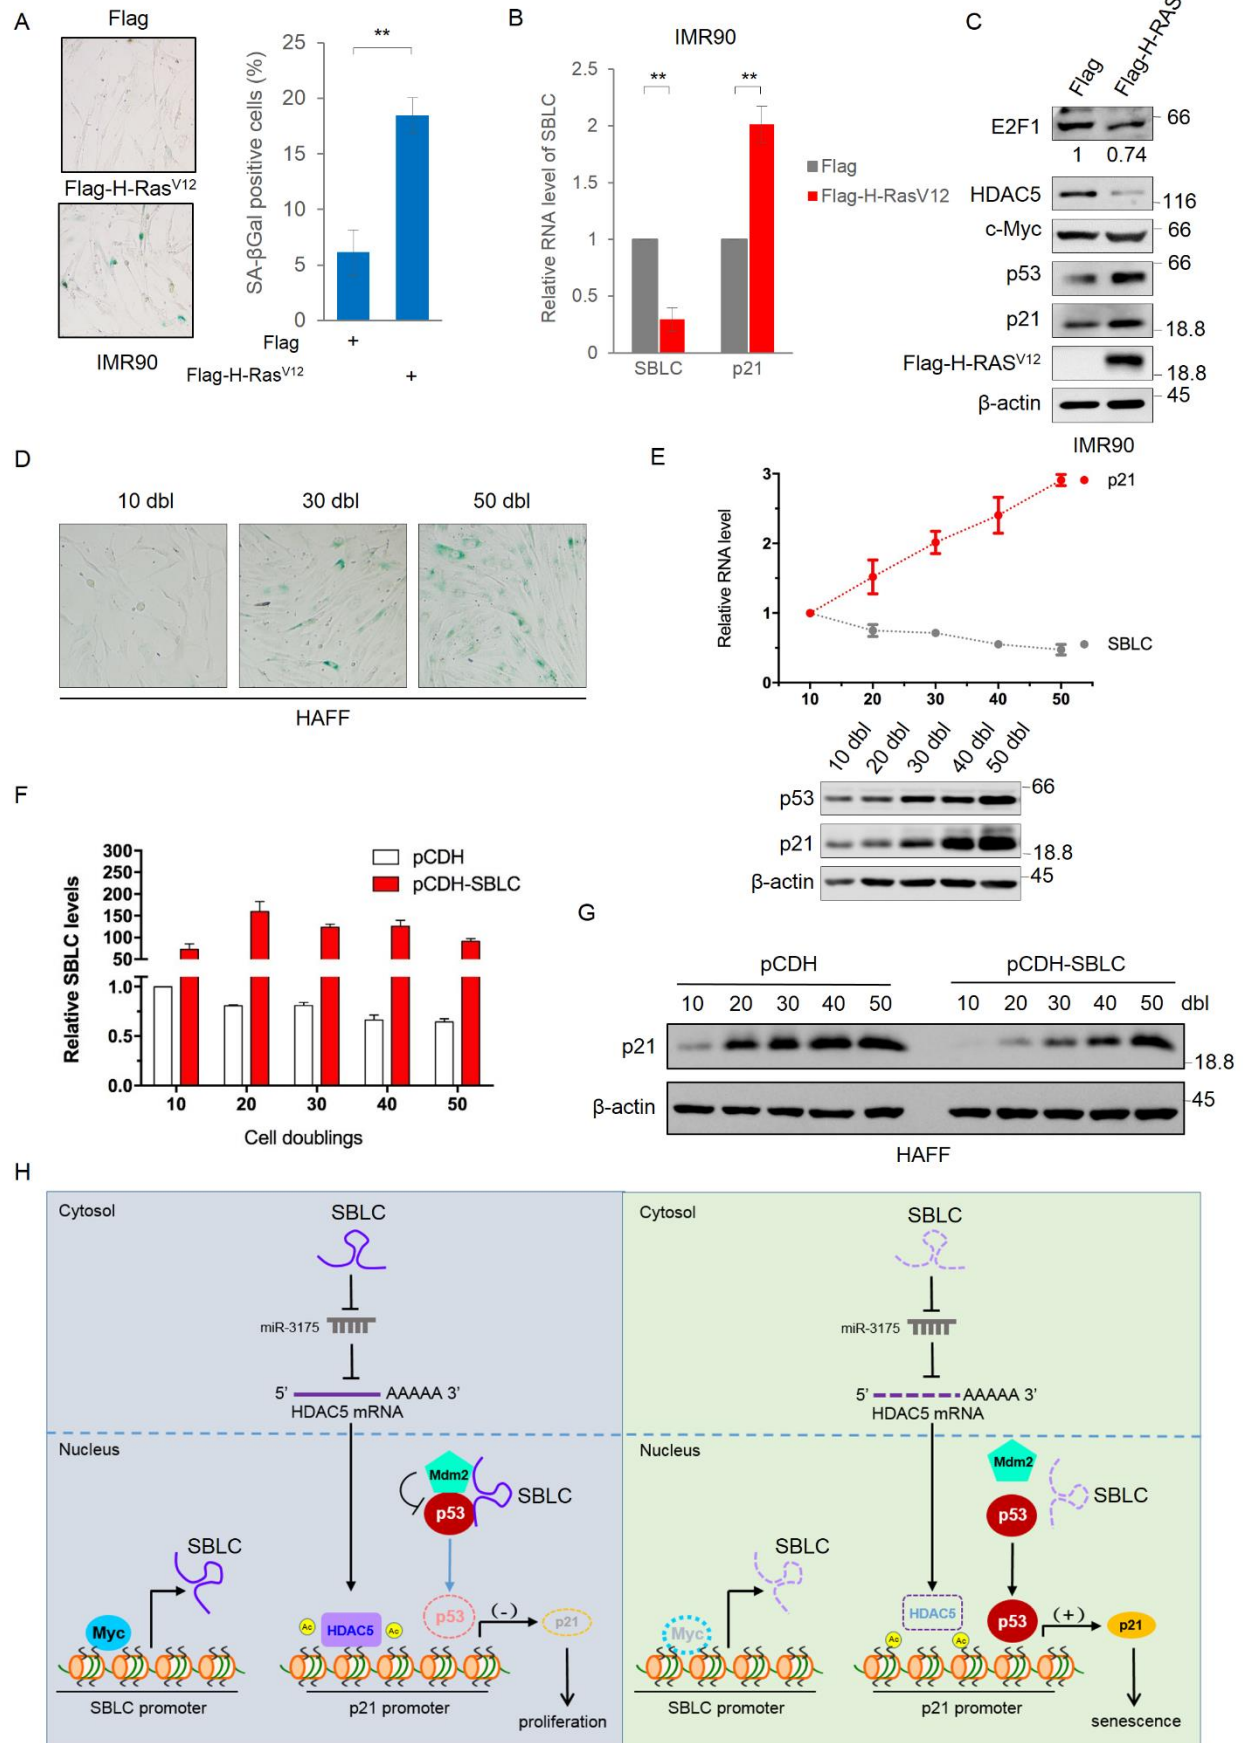

## **Figure S6**

**(A-C) SBLC is induced during oncogene induced senescence.** (A) IMR90 fibroblasts were transfected with a control (Flag empty vector) or Flag-H-RasV12 for 6 d before staining for SA  $\beta$ -galactosidase. Representative photomicrographs are shown on the left with quantitation at right showing significantly increased SA  $\beta$ -galactosidase staining in H-RasV12 transfected cells (right). \*\*  $p < 0.01$ , paired t-test, values are mean  $\pm$  SEM;  $n = 3$ . (B) Quantitation of SBLC and p21 RNA levels using qPCR measurements in cells from (A). \*\*  $p < 0.01$  by Students t-test, values are mean  $\pm$  SEM;  $n = 3$ . (C) Western blotting analysis of the indicate proteins in cells from (A). The results are representative of three experiments.

**(D-G) SBLC levels diminish during replicative senescence.** HAFF fibroblasts were cultured out to 50 doublings with samples collected every 10 doublings. (D) Representative photomicrographs showing progressively increased SA  $\beta$ -galactosidase staining. (E) Quantitation of SBLC and p21 RNA levels using qPCR measurements (left) along with assessment of p53 and p21 protein levels by blotting (right).  $\beta$ -actin served as a loading control throughout. (F) HAFF cells were transfected with control (pCDH) or SBLC (pCDH-SBLC) before performing the grow out experiment to 50 doublings. Relative SBLC levels were measured using qPCR. (G) Western blotting analysis was performed on the cells from (F) to measure p21 protein level.

**(H) Working model illustrating dual mechanisms of p21 repression by SBLC.**

**Table S1. Up-regulated lncRNAs**

| Name | Gene Symbol   | RNA length | Site                          |
|------|---------------|------------|-------------------------------|
| lnc1 | RP11-305N23.1 | 764        | chr11:119,381,835-119,475,708 |
| lnc2 | KDM4A-AS1     | 686        | chr1:43,699,923-43,707,341    |
| lnc3 | LINC01126     | 1646       | chr2:43,227,210-43,228,855    |
| lnc4 | AL773604.8    | 1031       | chr21:44,802,576-44,804,717   |
| lnc5 | RP11-343H5.6  | 358        | chr1:206,634,649-206,635,622  |
| lnc6 | NR_048535     | 2060       | chr21:44,269,335-44,299,699   |
| lnc7 | NR_034160     | 1156       | chr11:119,252,487-119,369,944 |
| lnc8 | RP11-344B5.4  | 966        | chr9:129,258,354-129,259,846  |

**Table S2. SBLC potential binding miRNA**

| miRNA    | Number of predicted binding sites in SBLC | Number of predicted binding sites in HDAC5 |
|----------|-------------------------------------------|--------------------------------------------|
| miR-1321 | 4                                         | 3                                          |
| miR-4756 | 4                                         | 3                                          |
| miR-3175 | 4                                         | 2                                          |
| miR-4739 | 5                                         | 3                                          |

**Table S3. Antibodies**

| Antibody       | Company                   | Catalog #   | Species | Application                             |
|----------------|---------------------------|-------------|---------|-----------------------------------------|
| c-Myc          | Cell Signaling Technology | 9402        | Rabbit  | Western Blotting and ChIP               |
| GAPDH          | CMCTAG                    | AT0002      | Mouse   | Western Blotting                        |
| $\beta$ -actin | CMCTAG                    | AT0001      | Mouse   | Western Blotting                        |
| GFP            | Abmart                    | M20004      | Mouse   | Western Blotting                        |
| p27            | abcam                     | ab32034     | Rabbit  | Western Blotting                        |
| p16            | abcam                     | ab108349    | Rabbit  | Western Blotting                        |
| p21            | Sigma                     | P1484       | Mouse   | Western Blotting                        |
| p53            | Santa Cruz Biotechnology  | SC-126      | Mouse   | Western Blotting and Immunofluorescence |
| Sp1            | Proteintech               | 219962-1-AP | Rabbit  | Western Blotting                        |

|           |                           |            |        |                                         |
|-----------|---------------------------|------------|--------|-----------------------------------------|
| Sp3       | Proteintech               | 26584-1-AP | Rabbit | Western Blotting                        |
| CHK2      | Cell Signaling Technology | 2662       | Rabbit | Western Blotting                        |
| Mdm2      | Santa Cruz Biotechnology  | SC-965     | Mouse  | Western Blotting and Immunofluorescence |
| Pirh2     | abcam                     | ab189907   | Rabbit | Western Blotting                        |
| Cop1      | ABclonal                  | A10463     | Rabbit | Western Blotting                        |
| HA-tag    | Sigma                     | H-9658     | Mouse  | Western Blotting                        |
| Flag-Tag  | Sigma                     | F-3165     | Mouse  | Western Blotting                        |
| PARP      | Santa Cruz Biotechnology  | SC-8007    | Mouse  | Western Blotting                        |
| caspase 3 | Cell Signaling Technology | 9665       | Rabbit | Western Blotting                        |
| HDAC1     | Proteintech               | 10197-1-AP | Rabbit | Western Blotting                        |
| HDAC2     | Proteintech               | 12922-3-AP | Rabbit | Western Blotting                        |
| HDAC3     | Proteintech               | 10255-1-AP | Rabbit | Western Blotting                        |
| HDAC4     | Signalway                 | 21141-1    | Rabbit | Western Blotting                        |
| HDAC5     | Proteintech               | 16166-1-AP | Rabbit | Western Blotting                        |
| HDAC6     | Immunoway                 | YT2147     | Rabbit | Western Blotting                        |
| HDAC7     | Immunoway                 | YT2119     | Rabbit | Western Blotting                        |
| HDAC8     | Proteintech               | 17548-1-AP | Rabbit | Western Blotting                        |
| HDAC9     | Immunoway                 | YT2149     | Rabbit | Western Blotting                        |
| HDAC10    | Immunoway                 | YT2146     | Rabbit | Western Blotting                        |
| E2F1      | Proteintech               | 12171-1-AP | Rabbit | Western Blotting                        |
| USF1      | Proteintech               | 22327-1-AP | Rabbit | Western Blotting                        |
| MAZ       | Proteintech               | 21068-1-AP | Rabbit | Western Blotting                        |
| CREB1     | Proteintech               | 12208-1-AP | Rabbit | Western Blotting                        |
| E2F1      | abcam                     | ab179445   | Rabbit | ChIP                                    |
| H3K9ac    | Merck Millipore           | 07-352     | Rabbit | ChIP                                    |
| H4K5ac    | Merck Millipore           | ABE535     | Rabbit | ChIP                                    |

**Table S4: Reagents**

| Reagent       | Company       |
|---------------|---------------|
| MG132         | Merck         |
| Cycloheximide | Sigma-Aldrich |
| M2 beads      | Sigma-Aldrich |



|                         |                          |
|-------------------------|--------------------------|
| A/G beads               | Thermo Fisher Scientific |
| Streptavidin beads      | Invitrogen               |
| Doxycycline             | Sigma-Aldrich            |
| Trypsin                 | Gibco                    |
| FBS                     | Biological Industries    |
| DMEM                    | Invitrogen               |
| rapamycin               | Sangon                   |
| Metformin hydrochloride | MedChemExpress           |
| Spermidine              | Sigma                    |
| Resveratrol             | Sigma                    |

**Table S5. Plasmids**

| Application           | Plasmids         |                      |                        |                        |
|-----------------------|------------------|----------------------|------------------------|------------------------|
| Lentiviral production | pLKO.1           | pRSV-Rev             | pCMV-VSV-G             | pCMV-Gag-Pol           |
| pLKO.1 constructs     | pLKO.1-sh-SBLC-1 | pLKO.1-sh-SBLC-2     | pLKO.1-sh-SBLC-3       | pLKO.1-sh-lnc1         |
|                       | pLKO.1-sh-lnc2   | pLKO.1-sh-lnc3       | pLKO.1-sh-lnc4         | pLKO.1-sh-lnc5         |
|                       | pLKO.1-sh-lnc6   | pLKO.1-sh-lnc7       | pLKO.1-sh-c-Myc        | pLKO.1-sh-HDAC5        |
|                       | pLKO.1-sh-E2F1   | pLKO.1-sh-p21        |                        |                        |
| pSIN constructs       | pSIN-GFP         | pSIN-c-Myc           |                        |                        |
| pGL3 reporters        | pGL3-Basic       | pGL3-P1              | pGL3-P2                | pGL3-P3                |
| pCDH constructs       | pCDH-CMV         | pCDH-SBLC            |                        |                        |
| p3 constructs         | p3xFLAG          | p3Xflag-p53          | p3Xflag-HDAC5          | p3Xflag-p53ΔTA         |
|                       | p3Xflag-p53ΔDBD  | p3Xflag-p53ΔC        | p3Xflag-MDM2           | p3Xflag-H-RasV12       |
| pRK5 constructs       | pRK5-flag-MDM2   | pRK5-flag-MDM2 1-199 | pRK5-flag-MDM2 100-299 | pRK5-flag-MDM2 300-491 |
| psiCHECK2 constructs  | psiCHECK-2       | psiCHECK-2-3175-1    | psiCHECK-2-3175-2      | psiCHECK-2-3175-1-mut  |
|                       | psiCHECK-2-SBLC  | psiCHECK-2-SBLC-mut  |                        |                        |
| Other constructs      | pMD2.G           | psPAX2               | HA-Ubiquitin           | HA-tag                 |
|                       | HA-MDM2          |                      |                        |                        |

**Table S6. shRNA sequences**

| Name       | Application          | Sequence (5'-3')                                           |
|------------|----------------------|------------------------------------------------------------|
| sh-lnc1-F  | plasmid construction | ccggAAAGATGAGTCAGGAACCTggatccGAGTTCCTGACTCATCTTTttttg      |
| sh-lnc1-R  | plasmid construction | aattcaaaaaAAAGATGAGTCAGGAACCTggatccGAGTTCCTGACTCATCTTT     |
| sh-lnc2-F  | plasmid construction | ccggGGGACCTGGCAAAGTACTTggatccAAGTACTTTGCCAGGTCCCttttg      |
| sh-lnc2-R  | plasmid construction | aattcaaaaaGGGACCTGGCAAAGTACTTggatccAAGTACTTTGCCAGGTCCC     |
| sh-lnc3-F  | plasmid construction | ccggGGAGATAACATGTGGACATggatccATGTCCACATGTTATCTCCttttg      |
| sh-lnc3-R  | plasmid construction | aattcaaaaaGGAGATAACATGTGGACATggatccATGTCCACATGTTATCTCC     |
| sh-lnc4-F  | plasmid construction | ccggGCTGTGAGAAATGTGGTTTggatccAAACCACATTTCTCACAGCttttg      |
| sh-lnc4-R  | plasmid construction | aattcaaaaaGCTGTGAGAAATGTGGTTTggatccAAACCACATTTCTCACAGC     |
| sh-lnc5-F  | plasmid construction | ccggGGCAAAGCCTGAACTAGAAggatccTTCTAGTTCAGGCTTTGCCttttg      |
| sh-lnc5-R  | plasmid construction | aattcaaaaaGGCAAAGCCTGAACTAGAAggatccTTCTAGTTCAGGCTTTGCC     |
| sh-lnc6-F  | plasmid construction | ccggGCACTCCTGTGGTCTACATggatccATGTAGACCACAGGAGTGCttttg      |
| sh-lnc6-R  | plasmid construction | aattcaaaaaGCACTCCTGTGGTCTACATggatccATGTAGACCACAGGAGTGC     |
| sh-lnc7-F  | plasmid construction | ccggGCTGGAATCCAGGAAGAATggatccATTCTTCCTGGATTCCAGCttttg      |
| sh-lnc7-R  | plasmid construction | aattcaaaaaGCTGGAATCCAGGAAGAATggatccATTCTTCCTGGATTCCAGC     |
| sh-SBLC-1F | plasmid construction | ccggGGAAGAATCGGAACCGAAAggatccTTTCGGTTCCGATTCTTCCttttg      |
| sh-SBLC-1R | plasmid construction | aattcaaaaaGGAAGAATCGGAACCGAAAggatccTTTCGGTTCCGATTCTTCC     |
| sh-SBLC-2F | plasmid construction | ccggGCAATAGCTCCGAGTCTTTggatccAAAGACTCGGAGCTATTGCttttg      |
| sh-SBLC-2R | plasmid construction | aattcaaaaaGCAATAGCTCCGAGTCTTTggatccAAAGACTCGGAGCTATTGC     |
| sh-SBLC-3F | plasmid construction | ccggGGTCTCAGAGGGCTAAATTCaggatccTGAATTTAGCCCTCTGAGACCTttttg |
| sh-SBLC-3R | plasmid construction | aattcaaaaaGGTCTCAGAGGGCTAAATTCaggatccTGAATTTAGCCCTCTGAGACC |

**Table S7. PCR primers**

| Name         | Application | Sequence (5'-3')                               |
|--------------|-------------|------------------------------------------------|
| qRT-lnc1-F/R | qPCR        | AATATGCTTAAGGGTCTGGCC/ TGGTAGCACAGAAGGGAGG     |
| qRT-lnc2-F/R | qPCR        | CCTGCACACAAAGGAAAGATG/ CGCTGGCCTTAATGTCACCTT   |
| qRT-lnc3-F/R | qPCR        | GACCAGTTTCACTTTTAGCACC/ CAAAGAACAAACCAGACCACAG |
| qRT-lnc4-F/R | qPCR        | AGTGAGTGGGTGTGCTTTC/ GGGGAGAGACTGCCATCTTG      |
| qRT-lnc5-F/R | qPCR        | GACGCTCCCACGGACTTAG/ AGGCTTTGCCGCTTCATGC       |
| qRT-lnc6-F/R | qPCR        | GCTGGCACATGTTGATGATG/ TTGGAGAAGGTGGACGCCAG     |
| qRT-lnc7-F/R | qPCR        | AGCGAGATGAAGAGTTTACACC/ ACCAAATCCCCAGACCAATG   |

|                         |                      |                                                           |
|-------------------------|----------------------|-----------------------------------------------------------|
| qRT-SBLC-F/R            | qPCR and RT-PCR      | CACACATCTACTCTCTTACAGTTCTAT/ TTATCTGGGAGGACCAATGTAATC     |
| c-Myc-F/R               | qPCR                 | CTGAGGAGGAACAAGAAGATGAG/ TGTGAGGAGGTTTGCTGTG              |
| $\beta$ -actin-F/R      | qPCR and RT-PCR      | GACCTGACTGACTACCTCATGAAGAT/ GTCACACTTCATGATGGAGTTGAAGG    |
| Glut1-F/R               | qPCR                 | CAGATGATGCGGGAGAAGAA/ CGAAGATGCTCGTGGAGTAATA              |
| p21-F/R                 | qPCR                 | GGCGGCAGACCAGCATGACAGATT/ GCAGGGGGCGGCCAGGGTAT            |
| U6-F/R                  | qPCR                 | GCTTCGGCAGCACATATACTAAAAT/ CGCTTCACGAATTTGCGTGTTCAT       |
| Common miRNA reverse    | qPCR                 | CAGTGCCTGTCTGGAGT                                         |
| miR-3175                | RT-PCR               | GTCGTATCCAGTGCCTGTCTGGAGTCGGCAATTGCACTGGATACGACACGTCACTGC |
| miR-3175 F              | qPCR                 | GTTTCGGGGAGAGAACGC                                        |
| IRES GFP constructs-F/R | plasmid construction | GGAATTCCTCCATCCTTGGGCTCC/ GGATATCCCACCAAGCTCGAGAGGC       |
| IRES GFP-F/R            | RT-PCR               | AGTGCTTCAGCCGCTACCC/ GTTGTACTCCAGCTTGTGCC                 |

**Table S8. Probes and primers**

| Name                 | Application  | Sequence (5'-3')                               |
|----------------------|--------------|------------------------------------------------|
| p21 promoter-A-F/A-R | ChIP         | CTCAATGCCACCACCTTAAC/ AGCCAGGATGAATTGGTAAAG    |
| p21 promoter-B-F/B-R | ChIP         | CCTGAAAGCAGAGGGGCTTC/ CATCCAAAGGGCTGGTTGTC     |
| p21 promoter-C-F/C-R | ChIP         | ATTCTAACAGTGTGTGTCC/ CTGGACACATTTCCCAC         |
| p21 promoter-D-F/D-R | ChIP         | CGGTTGTATATCAGGGCCGC/ TCCGGCTCCACAAGGAAGT      |
| p21 promoter-E-F/E-R | ChIP         | CAGCTGCCGAAGTCAGTTCC/ TCACCTCTCTGAGTGCCTC      |
| p21 promoter-F-F/F-R | ChIP         | GCACACGGTGTCTCTAAGTG/ GACCAGGATTCTGTACTTG      |
| p21 promoter-G-F/G-R | ChIP         | GCTCAAATGATTCTCCCACCTC/ CAGAGAGGCCCATCACAAATC  |
| p21 promoter-H-F/H-R | ChIP         | GGCTGGAGGAAGTGCAGACTG/ CCCCCAAATATGTGTGAATTGCC |
| p21 promoter-I-F/I-R | ChIP         | CCCGTGTCTCCTTTTCTCTC/ TACCACCCAGCGGACAAGTGG    |
| c-Myc-p1F/p1R        | ChIP         | CACGATGAGGAAGCAAATAGACC/ CCGTGGGATCATCTGATACCC |
| c-Myc-p2-1F/1R       | ChIP         | CTTCTGCGTCTGCTTGTCTT/ GCTTTGAACCTGGTCTGTATT    |
| c-Myc-p2-2F/2R       | ChIP         | GCTCTGCTCATCTGTGTGAT/ GGGAAAGCCCAATGACCTC      |
| c-Myc-p3-1F/1R       | ChIP         | CCTCCATTGGCCCGGTT/ GCGGCTCCCGGGGACACGTG        |
| c-Myc-p3-2F/2R       | ChIP         | CCGCCAGAATTTGACAGGG/ CCCGGCTTCGTTCCCCG         |
| c-Myc-p3-3F/3R       | ChIP         | AACGAAGCCGGGCGGAG/ AAAGGAAGAGGGGGTGCC          |
| E2F1-B1F/B1R         | ChIP         | GACCAGGGTTCAAAGCCAGA/ CAGGAGAGCTGGCTACACAC     |
| E2F1-B2F/B2R         | ChIP         | CCGGGAGCCGCCAGAATTTG/ CTCCGCCCGCTTCGTTCC       |
| SBLC-1-sense         | Biotin probe | CTTCCTCCAGGAAGAATCGGAACCGAAAGC                 |

|                  |              |                                           |
|------------------|--------------|-------------------------------------------|
| SBLC-2-sense     | Biotin probe | AGCCAGCAATAGCTCCGAGTCTTTCCTCCC            |
| SBLC-3-sense     | Biotin probe | TGACATGGTCTCAGAGGGCTAAATTCAAGG            |
| SBLC-1-antisense | Biotin probe | GCTTTCGGTTCGATTCTTCCTGGAGGAAG             |
| SBLC-2-antisense | Biotin probe | GGGAGGAAAGACTCGGAGCTATTGCTGGCT            |
| SBLC-3-antisense | Biotin probe | CCTTGAATTTAGCCCTCTGAGACCATGTCA            |
| SBLC-antisense-F | ISH          | GGAAACGCTGTCAAGATGTC                      |
| SBLC-antisense-R | ISH          | TAATACGACTCACTATAGGGAAAACCTGTCAGGATGGCGTG |
